1           **Long-read sequence capture elucidates the evolution of the**  
2           **hemoglobin gene clusters in codfishes**

3  
4   Siv Nam Khang Hoff<sup>\*a</sup>, Helle T. Baalsrud<sup>\*a‡</sup>, Ave Tooming-Klunderud<sup>a</sup>, Morten  
5   Skage<sup>a</sup>, Todd Richmond<sup>b</sup>, Gregor Obernosterer<sup>c</sup>, Reza Shirzadi<sup>d</sup>, Ole Kristian  
6   Tørresen<sup>a</sup>, Kjetill S. Jakobsen<sup>a</sup> and Sissel Jentoft<sup>a‡</sup>

7  
8   <sup>a</sup> Centre for Ecological and Evolutionary Synthesis, Department of Biosciences,  
9   University of Oslo, Oslo, Norway

10   <sup>b</sup> Roche NimbleGen Inc., Madison, WI, USA

11   <sup>c</sup> Roche Diagnostics, Mannheim, Germany

12   <sup>d</sup> Roche Diagnostics, Oslo, Norway

13

14   \* these authors contributed equally to this work

15

16   ‡ Correspondence to: [h.t.baalsrud@ibv.uio.no](mailto:h.t.baalsrud@ibv.uio.no), [sissel.jentoft@ibv.uio.no](mailto:sissel.jentoft@ibv.uio.no)

17

## Abstract

18 Combining high-throughput sequencing with targeted sequence capture has become  
19 an attractive tool to study specific genomic regions of interest. Most studies have so far  
20 focused on the exome using short-read technology. This approach does not capture  
21 intergenic regions needed to reconstruct genomic organization, including regulatory  
22 regions and gene synteny. In this study, we demonstrate the power of combining  
23 targeted sequence capture with long-read sequencing technology, leading to the  
24 successful sequencing and assembling of the two hemoglobin (Hb) gene clusters LA  
25 (~100kb) and MN (~200kb) across eight species of codfishes that are separated by up to  
26 70 million years of evolution. The highly continuous assemblies – capturing both  
27 intergenic and coding sequences – revealed overall conserved genetic organization and  
28 synteny of the *Hb* genes within this lineage, yet with several, lineage-specific gene  
29 duplications. Moreover, for some of the species examined we identified amino acid  
30 substitutions at two sites in the *Hbb1* gene as well as length polymorphisms in its  
31 regulatory region, which has previously been linked to temperature adaptation in  
32 Atlantic cod populations. Taken together, our study highlights the efficiency of  
33 targeted long-read capture for comparative genomic studies by shedding light on the  
34 evolutionary history of the *Hb* gene family across the highly divergent group of  
35 codfishes.

36

37 **Key words:** Targeted sequence capture, comparative genomics, Gadiformes, PacBio  
38 sequencing, teleosts

39

40

## Article summary

41 Hemoglobins (Hbs) are key respiratory proteins in most vertebrates. In fishes, Hbs are  
42 shown to be of great importance for ecological adaptation, as environmental factors  
43 including temperature, directly influences the solubility of O<sub>2</sub> in surrounding waters as  
44 well as the ability of Hb to bind O<sub>2</sub> at respiratory surfaces.

45 We here combine targeted sequence capture and long-read sequencing to reconstruct  
46 and resolve the organization of *Hb* genes and their flanking genes in a selection of  
47 codfishes, inhabiting different environmental conditions. Our results shed light on the  
48 evolutionary history of *Hb* genes across species separated up to 70 million years of  
49 evolution, revealing genetic variations possibly linked to thermal adaptation.

50

## Introduction

51 The rapid advancement of high-throughput sequencing has over the last decade  
52 revolutionized genomic research with the increasing numbers of whole genome  
53 resources available for multiple vertebrate species, including the diverse group of  
54 teleost fishes (Volf 2005; Ellegren 2014; Goodwin *et al.* 2016; Malmstrøm *et al.* 2016;  
55 2017). However, whole genome sequencing (WGS) and generation of high quality  
56 genome assemblies are still considered costly and time-consuming (Jones and Good  
57 2015). For investigations concerning specific genomic regions there is no need for  
58 complete genome information, which has spurred the development of reduction  
59 complexity approaches such as targeted sequence capture (Teer *et al.* 2010; Grover *et*  
60 *al.* 2012; Samorodnitsky *et al.* 2015). The basic idea of targeted sequence capture  
61 involves design of specific probes covering the particular genomic area of interest  
62 generating an enriched coverage of the targeted sequences (Turner *et al.* 2009; Grover  
63 *et al.* 2012). Most studies using targeted sequence capture have to a large extent been  
64 directed towards the exome, often supported by the existence of a reference genome  
65 (Ng *et al.* 2009; Broeckx *et al.* 2014; Yoshihara *et al.* 2016), or transcriptome assemblies  
66 (Syring *et al.* 2016). Recent reports have, however, been focusing on off-target  
67 sequences in noncoding regions (Guo *et al.* 2012; Samuels *et al.* 2013; Syring *et al.*  
68 2016; Yoshihara *et al.* 2016; Morin *et al.* 2016), as they may contain crucial regulatory  
69 elements varying in sequence and length between populations or species, and could  
70 be of functional and evolutionary importance (Woolfe *et al.* 2004; Patrushev and  
71 Kovalenko 2014).

72 To our knowledge, sequence capture studies have so far been based on short-  
73 read sequencing technology (George *et al.* 2011; Samorodnitsky *et al.* 2015; Li *et al.*  
74 2015; Bragg *et al.* 2016), and construction of continuous sequences enabling resolution  
75 of gene organization have therefore not been possible. Comparative genetic studies  
76 of gene organization or synteny requires longer, more continuous stretches of DNA  
77 containing more than one gene (Huddleston *et al.* 2014). By its ability to span long  
78 stretches of repeats, long-read sequencing technology has been successfully applied  
79 to improve genome assembly statistics and generation of highly continuous genome  
80 assemblies for a growing number of species (English *et al.* 2012; Kim *et al.* 2014;  
81 Bickhart *et al.* 2017; Korf *et al.* 2017; Tørresen *et al.* 2017a; Tørresen *et al.* 2017b). For  
82 example, incorporation of long PacBio reads resulted in a significantly improved  
83 version of the Atlantic cod (*Gadus morhua*) genome assembly, i.e. a 50-fold increase in  
84 sequence continuity and a 15-fold reduction in the proportion of gaps (Tørresen *et al.*  
85 2017b). Correspondingly, utilizing long-read sequencing technology in combination

86 with targeted capture could yield longer continuous assemblies of specific genomic  
87 regions of interest, allowing in-depth comparative genetic studies, even in species  
88 where a reference genome is not available.

89 In fishes, the hemoglobin (*Hb*) gene family, encoding the protein subunits Hba  
90 and Hbb, has shown to be of importance for ecological adaptation, as environmental  
91 factors such as temperature directly influences the ability of Hb to bind O<sub>2</sub> at  
92 respiratory surfaces and its subsequent release to tissues (Wells 2005). In a recent  
93 report, a full characterization of the *Hb* gene repertoire – using comparative  
94 genomics analysis – uncovered a remarkably high *Hb* gene copy variation within the  
95 codfishes (Baalsrud *et al.* 2017). Notably, a negative correlation between the number  
96 of *Hb* genes and depth of which the species occur was observed, suggesting that the  
97 more variable environment in epipelagic waters have facilitated a larger and more  
98 diverse *Hb* gene repertoire, which was supported by evidence of diversifying  
99 selection (Baalsrud *et al.* 2017). Furthermore, in Atlantic cod, two tightly linked  
100 polymorphisms at amino acid positions 55 and 62 of the Hbb1-globin – suggested to  
101 be associated with thermal adaptation – exhibit a latitudinal cline in allele frequency  
102 in populations inhabiting varying temperature and oxygen regimes in the North  
103 Atlantic and Baltic Sea (Andersen *et al.* 2009). Populations found in the southern  
104 regions display the Hbb1-1 variant (Met55Lys62), whereas more northern  
105 populations largely display the Hbb1-2 variant (Val55Ala62) (Andersen *et al.* 2009).  
106 The Hbb1-1 variant has been shown to be insensitive to temperature whereas Hbb1-2  
107 is temperature dependent with a higher O<sub>2</sub> affinity than Hbb1-1 at colder  
108 temperatures (Karpov and Novikov 1980; Andersen *et al.* 2009), however, this has  
109 been questioned by (Barlow *et al.* 2017). Additionally, an indel polymorphism within  
110 the promoter of the *Hbb1* gene has been reported to be in linkage disequilibrium with  
111 the above-mentioned polymorphisms (Star *et al.* 2011). Examination of multiple  
112 Atlantic cod populations uncovered that a longer promoter variant is associated with  
113 *Hbb1-2* and found to up-regulate its gene expression at higher temperatures, i.e.  
114 aiding in the maintenance of total oxygen-carrying capacity (Star *et al.* 2011).

115 In teleosts, the *Hb* genes are found to reside at two distinct genomic regions –  
116 the MN and LA cluster. Earlier reports have shown that there is a high evolutionary  
117 turnover of *Hb* genes across teleosts, with lineage-specific duplications and losses,  
118 which is in stark contrast to genes flanking the *Hb* genes, where the synteny is highly  
119 conserved (Quinn *et al.* 2010; Opazo *et al.* 2013; Feng *et al.* 2014). In this study, the  
120 overall goal was to elucidate the evolutionary past of the *Hb* clusters – including *Hb*  
121 genes, flanking genes and intergenic sequences – within the phylogenetically diverse  
122 group of codfishes (Gadiformes) by taking the advantage of long read sequencing

123 technology combined with targeted sequence capture. Eight codfish species were  
124 carefully selected on the basis of both phylogenetic and habitat divergence, implying  
125 that they are exposed to a variety of environmental factors as well as displaying  
126 distinct life-history traits. A highly continuous genome assembly of Atlantic cod  
127 (Tørresen *et al.* 2017b) as well as low coverage draft genome assemblies of all eight  
128 species (Malmstrøm *et al.* 2017) were used in the design of the probes covering the  
129 genomic regions of interest. To enable targeted sequence capture for PacBio RSII  
130 sequencing, we modified the standard protocol for sequence capture offered by  
131 NimbleGen, i.e. the SeqCap EZ (Roche NimbleGen), as well as generating custom-  
132 made barcodes. This combined approach resulted in successful capturing and  
133 assembling of the two *Hb* gene clusters across the codfishes examined. The  
134 generation of highly continuous assemblies – for most of the species – enabled  
135 reconstruction of micro-synteny revealing lineage-specific gene duplications and  
136 identification of a relatively large and inter-species variable indel located in the  
137 promoter region between the *Hbb1* and *Hba1* genes.

138 Our study demonstrates that this approach, combining sequence capture  
139 technology with long-read sequencing is a highly efficient and versatile method to  
140 investigate specific genomic regions of interest – with respect to micro-synteny,  
141 regulatory regions and genetic organization – across distantly related species where  
142 genome sequences are lacking.

143

## Results

### 144 **Capture and *de novo* assembly of the target regions**

145 The capture probe design (workflow schematically shown in Figure 1) resulted in a  
146 total of 7057 probes based on the target region in Atlantic cod, covering 337 kbp of  
147 sequence. 26774 probes were designed for the additional codfishes, covering in total  
148 an area of 1.82 Mbp of target sequence. The target region and the *Hb* gene clusters  
149 were successfully captured and enriched for eight codfishes; Atlantic cod (*Gadus*  
150 *morhua*), haddock (*Melanogrammus aeglefinus*), silvery pout (*Gadiculus argenteus*), cusk  
151 (*Brosme brosme*), burbot (*Lota lota*), European hake (*Merluccius merluccius*), marbled  
152 moray cod (*Muraenolepus marmoratus*), and roughhead grenadier (*Macrourus berglax*),  
153 with number of reads spanning from 35573 to 73005 (Table 1). The average read  
154 length was 3032 bp, varying from 2836 bp in European hake to 3265 bp in burbot,  
155 resulting in the capture of an average of 16.71 Mbp per species (Table 1). By mapping  
156 reads back to the capture target region we found that the average mapping depth  
157 was variable across the target region for all species (Figure 2 and 3). Because of the  
158 skewed distribution of mapping depth, we also calculated median depth, which was,  
159 as expected, the highest for Atlantic cod at 242x (Table S1). The median mapping  
160 depth was consistently high for most of the other species as well, with the lowest for  
161 roughhead grenadier (12x). Both median and average depths for the MN region are  
162 persistently higher than for the LA region for all species, with the exception of silvery  
163 pout (Table S1). Furthermore, positions with high degree of mapping corresponded  
164 to the location of the genes used in the design of the capture probes across all species  
165 (Figure 2 and Figure 3). The percentage of reads mapping to the target region ranged  
166 from 25-43%, however, the percentage of the target region covered by reads ranged  
167 from 53-100% with five species having more than 90% of the target region covered by  
168 reads (Figure 4c and Table S1).

169 To address factors influencing capture success we compared various capture  
170 statistics to overall genomic divergence between the Atlantic cod genome and  
171 independent WGS data for each species from (Malmstrøm *et al.* 2017) (Table S1). We  
172 found a strong negative correlation between genomic divergence to Atlantic cod and  
173 median mapping depth against the target region ( $r=-0.90$ , Figure 4a), percent of reads  
174 mapped to the target region ( $r=-0.90$ , Figure 4b), and percentage of reads mapped to  
175 the target region ( $r=-0.84$ , Figure 4c).

176 We constructed *de novo* assemblies with quite consistent assembly statistics  
177 across species. Contig N50 ranged from 8055 bp in burbot to 6523 bp in European  
178 hake and the total number of contigs varied from 205 in burbot to 455 in marbled

179 moray cod. However, there was some variation in the size of the largest contig,  
180 which ranged from 79 kbp in Atlantic cod to 30 kbp in marbled moray cod (Table 1).  
181 To evaluate whether the assemblies represent the actual target regions we mapped  
182 the *de novo* assemblies for each species to the target region in Atlantic cod, for which  
183 the capture design is largely based upon (Figure 2 and 3). As expected, the  
184 assemblies corresponded to the regions with high coverage of reads, i.e. the areas of  
185 the target region containing genes included in the probe design.

## 186 **Synteny of the *Hb* gene regions**

187 Our capture design combined with long-read PacBio sequencing allowed us to  
188 reconstruct micro-synteny of the MN and LA regions for Atlantic cod, haddock,  
189 silvery pout, cusk, burbot, European hake, marbled moray cod and roughhead  
190 grenadier (Figure 5). From the *de novo* assemblies, we were able to identify the  
191 majority of the *Hb* genes and all of the flanking genes, which show that our capture  
192 design was successful. However, the degree of continuity varied in the different  
193 assemblies. In Atlantic cod, haddock, silvery pout, cusk, burbot and European hake  
194 we could infer micro-synteny revealing that *Hb* and their flanking genes organization  
195 largely followed what has previously been reported for Atlantic cod (Figure 5) (Star  
196 *et al.* 2011). We found *Hbb4* only to be present in Atlantic cod (Figure 5b), which is in  
197 line with (Baalsrud *et al.* 2017). Furthermore, the *de novo* assemblies confirmed a  
198 lineage-specific duplication of *Hbb2* in the roughhead grenadier (Baalsrud *et al.* 2017).  
199 Additionally, we identified a complete *Hba4*-like gene in the assembly of the marbled  
200 moray cod, not earlier identified in this species. However, the *Hba4*-like gene in  
201 marbled moray cod is likely a pseudogene due to a frameshift mutation causing  
202 multiple stop codons. Furthermore, we were able to identify most of the *Hb* genes  
203 reported in the recent study of (Baalsrud *et al.* 2017), however, a few are missing from  
204 our dataset (Figure 5a and b). Pairwise sequence alignment of these paralogous *Hb*  
205 genes from (Baalsrud *et al.* 2017) revealed sequence identities up to 98 % (Table S2).

## 206 **Target region in the haddock and Atlantic cod genome assemblies**

207 As a proof of concept, we reconstructed synteny of the target region in the most  
208 recent genome assemblies of Atlantic cod (gadMor2 (Tørresen *et al.* 2017b)) and  
209 haddock (melAeg (Tørresen *et al.* 2017a)). In Atlantic cod, the MN region is located  
210 on linkage group 2 (Figure 5a) and LA on linkage group 18 (Figure 5b), in haddock  
211 MN is located on scaffold MeA\_20160214\_scaffold\_771 (Figure 5a) and LA on  
212 scaffold MeA\_20160214\_scaffold\_1676 (Figure 5b). The overall synteny in Atlantic  
213 cod was congruent with (Wetten *et al.* 2010) except for the relative direction of the  
214 genes *foxj1a* and *rhbdf1*. Furthermore, the organization of *Hbs* and their flanking

215 genes in the genome assembly of haddock is conserved compared to Atlantic cod  
216 with the exception of *Hbb4* in the MN region, which is absent in haddock (Figure 5).

### 217 **Repetitive sequences in the in the *Hb* gene regions**

218 Quantifying the amount of repetitive sequences in the target region(s) was only  
219 possible for Atlantic cod (gadMor2) and haddock (melAeg), for which high-quality  
220 genome assemblies exist. The amount of repetitive sequences in the target region  
221 differed between the MN cluster and the LA cluster in Atlantic cod. The MN region  
222 (214 kb) contained a total of 10.7% repeated sequences, including 1.0% retro-  
223 elements, 1.3% transposons, 5.8% simple repeats, and 2.6% of various low complexity  
224 and unclassified repeated sequences (Table S3). In comparison, in the smaller LA  
225 region (123 kb) the proportion of repeated sequences was twice as high (20.3%),  
226 which comprised of 2.8% retro-elements, 2.4% transposons, 13.8% simple repeats,  
227 and 1.3% of various low complexity and unclassified repeated sequences.  
228 Furthermore, the orthologous target regions in haddock followed the same pattern.  
229 The MN region contained 16.3 % repeated sequences, in contrast to 19.8 % found in  
230 the LA region (Table S3).

### 231 **Insertions and deletions in the promoter region of *Hba1* – *Hbb1***

232 The previously shown 73 bp indel in the bi-directional promoter region of *Hba1* and  
233 *Hbb1* – discerning the cold-adapted migratory Northeast Arctic cod (NEAC) from the  
234 more temperate-adapted southern Norwegian coastal cod (NCC) (Star *et al.* 2011) –  
235 was confirmed by the improved version of the NEAC assembly (gadMor2). The  
236 continuity of our capture assemblies (Figure 5) enabled location of the orthologous  
237 captured regions in haddock, silvery pout and cusk. In each of the species an indel of  
238 variable length were identified (Figure 6). Compared to the long promoter variant –  
239 found to be linked with the *Hbb1-2* in Atlantic cod – the indel is shorter in the other  
240 species by 11 bp in haddock, 22 bp in silvery pout and 56 bp in cusk (Figure 6).  
241 Although the indels are varying in length, the conserved flanking sequences in the  
242 alignment clearly show that they represent orthologous regions. Moreover, we found  
243 the amino acid positions at 55 and 62 of the *Hbb1* gene to vary between species;  
244 Haddock has Val55-Lys62, silvery pout has Met55-Gln62, while cusk has Met55-  
245 Lys62 similarly to NEAC (Figure 6). Additionally, we investigated amino acid  
246 positions 55 and 62 in the *Hbb1* gene across a number additional codfish species for  
247 which we have available gene sequences from (Baalsrud *et al.* 2017), revealing these  
248 sites to be variable across this lineage (Table S4). Ancestral reconstruction of *Hbb1*  
249 demonstrated that the ancestral state in position 55 was Met in codfishes, and in



250 position 62 was Lys in all codfishes except *Bregmaceros cantori* (Supplementary  
251 Figures S1 and S2).

252

## Discussion

### 253 **Capture of *Hb* gene clusters with 70 million years divergence time reveal** 254 **conserved synteny and lineage-specific *Hb* duplications**

255 We here demonstrate a successful in-solution targeted sequence capture and  
256 assembling of coding and noncoding sequences of the *Hb* clusters from codfish  
257 species separated by up to 70 million years (My) of evolution. Two features make our  
258 approach unique from earlier studies. First, the target regions consisted of both  
259 coding and noncoding genomic sequences. Second, we designed capture of large  
260 fragments – combined with development of custom-made probes – in order to utilize  
261 the long-read PacBio sequencing platform. This is in contrast to current targeted  
262 capture sequencing protocols that are based on short-read sequencing technologies  
263 (George *et al.* 2011; Mascher *et al.* 2013).

264 The organization and orientation of the *Hb* flanking genes that we identified  
265 were conserved across all species (Figure 5a and b). However, in concordance with  
266 earlier studies of the *Hb* region, we found significant variation in copy numbers of  
267 the *Hb* genes, with lineage specific duplications and losses (Star *et al.* 2011; Opazo *et al.*  
268 2013; Feng *et al.* 2014; Baalsrud *et al.* 2017). We only found *Hbb4* in Atlantic cod,  
269 supporting earlier studies showing that *Hbb4* is the result of a recent duplication in  
270 this species (Borza *et al.* 2009; Baalsrud *et al.* 2017). Interestingly, the presence of two  
271 copies of *Hbb2* on the same contig in the roughhead grenadier *de novo* assembly  
272 confirmed a lineage specific gene duplication of *Hbb2*, which was found in a recent  
273 study of *Hbs* in codfishes (Baalsrud *et al.* 2017). Additionally, a copy of the *Hba4* was  
274 found in the *de novo* assembly of the marbled moray cod not found in (Baalsrud *et al.*  
275 2017). The presence of a frame-shifting mutation that is causing multiple stop codons  
276 indicated that this *Hba4* gene is most likely a pseudogene. *Hba4* is also a pseudogene  
277 in the closely related species *Mora moro*, *Trachyrincus scabrus*, *T. murrayi* and  
278 *Melanonus zugmayeri* (Baalsrud *et al.* 2017). Although we identified most of the *Hb*  
279 genes from (Baalsrud *et al.* 2017), a few were absent from this dataset (Figure 5a and  
280 b), which we suspect may be due to collapse of paralogous *Hb* genes, as they may  
281 have as high as 98% sequence identity (Table S2).

### 282 **Length variation in the bi-directional *Hba1-Hbb1* promoter within the** 283 **codfishes**

284 The discovery of a promoter of variable length between *Hba1* and *Hbb1* in different  
285 species (Figure 6) was concordant with earlier findings of length variation in the  
286 homologous region in different populations of Atlantic cod (Star *et al.* 2011). The

287 migratory NEAC population has been shown to harbor the 73 bp longer variant at a  
288 higher frequency compared to coastal cod populations (see Figure 6 and (Star *et al.*  
289 2011)). Interestingly, we found relatively long promoters with high sequence  
290 similarity to the NEAC indel in haddock and silvery pout. In contrast, cusk  
291 displayed a relatively short promoter, however, still 17 bp longer than in NCC  
292 (Figure 6). Furthermore, we found the amino acid positions 55 and 62 in *Hbb1*,  
293 known to be polymorphic in Atlantic cod, to be variable across all codfishes included  
294 in this study (Figure 6). Investigations of the same positions in a number additional  
295 codfishes for which we have available gene sequences (Baalsrud *et al.* 2017), revealed  
296 that these positions are highly variable across this lineage (Table S2). Notably, the  
297 most likely ancestral state of codfish *Hbb1* is Met55Lys62 (Supplementary Figures S1  
298 and S2). Cusk and the coastal/southern Atlantic cod thus both display the ancestral  
299 state as well as a short promoter, although the cusk promoter was 17 bp longer  
300 (Figure 6). Collectively, these results suggest two different scenarios for promoter  
301 length evolution. Scenario 1: The short promoter represents the ancestral state of the  
302 Gadidae-family (including cusk and Atlantic cod; see (Malmstrøm *et al.* 2016)) and  
303 that silvery pout and some populations of Atlantic cod have evolved a longer  
304 promoter. Scenario 2: The long promoter is the ancestral state with independent  
305 deletions of variable lengths in cusk, silvery pout, haddock and coastal/southern  
306 Atlantic cod (*Hbb1-1*). To disentangle this, we would need to obtain promoter  
307 sequences from additional gadiform species. Regardless, the short-long promoter  
308 polymorphism has been maintained throughout speciation events based on the  
309 presence of both variants in Atlantic cod. Moreover, in both scenarios, cusk and  
310 Atlantic cod (*Hbb1-1*) have maintained the ancestral Met55Lys62, while silvery pout,  
311 haddock and Atlantic cod (*Hbb1-2*) have acquired substitutions at these positions due  
312 to similar selection pressures or genetic drift. In this regard, it could be mentioned  
313 that the NEAC, haddock and silvery pout display migratory behavior (e.g. diurnally  
314 feeding movements as well as seasonal spawning migrations) compared to the more  
315 stationary cusk and coastal cod (Eschemeyer and Fricke 2017) which could mean that  
316 they have a higher O<sub>2</sub> demand and are exposed to greater temperature variation,  
317 which in turn has selected for a temperature-dependent long promoter. Furthermore,  
318 given that promoter length and positions 55/62 at *Hbb1* are important genetic  
319 components of temperature adaptation in Atlantic cod populations (Star *et al.* 2011),  
320 they most likely play a role in temperature adaptation in the other codfishes.

### 321 **Assembly success affected by probe design and repeat content**

322 In some species, nearly the complete target region is assembled in large contigs  
323 containing multiple genes including cusk, whereas in other species such as the more

324 distantly related roughhead grenadier, the cluster is more fragmented (Figure 5). In  
325 all species, the areas of the target regions that harbor genes of which probes are  
326 designed for, as well as any areas containing repeated sequences, have very high  
327 depths in comparison to the areas of intergenic sequences (Figure 2 and 3). This  
328 poses a challenge for the assembly software, which is based in the assumption of  
329 uniform depth over the sequencing data (Miller *et al.* 2010).

330 Overall, the MN cluster seems to be more successfully assembled than the LA  
331 cluster, which is more fragmented (Figure 5). Differences in assembly completeness  
332 between the two regions might be a result of several factors. Firstly, the MN region  
333 has more flanking genes in closer proximity to the *Hb* region, which results in a  
334 higher density of probes. Secondly, the overall repeat content of the LA region is one  
335 order of magnitude larger than in the MN region, largely due to the larger  
336 proportion of simple repeats. Repeat content is a major interference in capture  
337 experiments because unwanted repetitive DNA may be enriched for, especially if  
338 there are repeated sequences included in the probe design. Furthermore, if probes  
339 were not completely covered by target DNA they get single-stranded sticky ends that  
340 can hybridize to repetitive or other non-target DNA (Newman and Austin 2016).  
341 Lastly, unless there were some longer reads that bridged such areas, this would in  
342 turn have led to gaps in the downstream *de novo* assemblies. Following that the  
343 assembly success was possibly a result of read length, we reason that a future  
344 increase of the average read length from 3 kbp to 5-10 kbp, would be sufficient to  
345 substantially increase the completeness of the assemblies. Due to the current circular  
346 consensus (CCS) PacBio sequencing technology, however, which is a trade-off  
347 between accuracy and length of reads, longer reads with sufficient accuracy are not  
348 feasible.

### 349 **Long-read sequencing capture across species harbors new potential for** 350 **comparative genomic studies**

351 The number of reads mapping to the target region was in the range of 23-43%, which  
352 may seem low compared with other capture studies. For instance, a whole exome  
353 capture study on humans reported 56.1% of reads mapped to the target region (Guo  
354 *et al.* 2012) and a similar study in rats reported to have 78.3% of reads on target  
355 (Yoshihara *et al.* 2016). In contrast to our study however, these capture experiments  
356 enriched either the exome or ultra-conserved elements within a single species.  
357 Furthermore, we were able to cover up to 98% of the target region with >10 reads  
358 across species (Table S1) which is similar to what mentioned experiments within  
359 human and rat exomes reported (Guo *et al.* 2012; Yoshihara *et al.* 2016) and the main  
360 difference is the higher percentage of non-target sequences in our study.

361 We were able to capture complete genes for species with 70 My divergence  
362 time from the Atlantic cod (Figure 5). As expected, we found that capture success  
363 declines with increased sequence divergence between the reference genome of which  
364 we chiefly based our capture probes and the genomes of the included codfishes  
365 (Figure 4). It has been reported that orthologous exons were successfully captured in  
366 highly divergent frog species (with 200 My of separation), nevertheless the capture  
367 success greatly decreased with increased evolutionary distance (Hedtke *et al.* 2013).  
368 Similarly, it has been demonstrated that it is possible to capture >97% of orthologous  
369 sequences in four species of primates that diverged from humans 40 My ago, using  
370 probes entirely based on the human exome (George *et al.* 2011). Further, exomes were  
371 effectively captured from skink species that diverged up to 80 My from the reference,  
372 yet reporting a substantial decline in capture efficiency for sequences >10 % different  
373 from the reference species (Bragg *et al.* 2016). Our study stands out from previous  
374 capture experiments because intergenic, noncoding sequences in addition to genes  
375 were captured. Efficient capture of intergenic sequences requires less divergence  
376 time, as these regions usually evolve faster than genes (Koonin and Wolf 2010). Thus,  
377 the most distantly related species from Atlantic cod for which we captured both  
378 coding and noncoding sequences was burbot, which diverged from Atlantic cod 46  
379 My (Figure 5). We argue, in line with (Schott *et al.* 2017), that sequence divergence  
380 may be a more exact predictor of capture success than evolutionary distance, as the  
381 sequence capture process is mainly influenced by the difference between the probe  
382 sequence and the target sequence. European hake, marbled moray cod and  
383 roughhead grenadier all diverged from cod about 70 My ago, however, the European  
384 hake *Hb* regions was more successfully captured and assembled (Table 1; Figure 2).  
385 This could be due to European hake having a lower genome-wide divergence to  
386 Atlantic cod than marbled moray cod and roughhead grenadier (809k vs 879k and  
387 907k SNPs; Table S1).

388 Finally, it should be mentioned that cusk – which diverged from Atlantic cod  
389 39 My ago – was added to the experimental design after the species-specific probes  
390 were generated. Thus, the successful capture of cusk was therefore solely based on  
391 cross-species target enrichment, and could most likely been further improved if  
392 species-specific probes for this species have been included.

### 393 **Concluding remarks and future perspectives**

394 Here, we have successfully demonstrated that combining targeted sequence capture  
395 with long-read sequencing technology is as an efficient approach to obtain high  
396 quality sequence data of a specific genomic region, including both coding and

397 noncoding sequences, across evolutionary distant species. We show that genome-  
398 wide divergence is of importance for capture success across species. Furthermore, the  
399 use of long-read sequencing augmented the *de novo* assembly of regions containing  
400 repeated sequences that would otherwise fragment assemblies based on short-read  
401 sequencing. This is crucial for capturing complete intergenic sequences that may be  
402 highly divergent compared to genic regions even among fairly closely related  
403 species. Given the rapid development in sequencing technologies future methods  
404 will enable read-through of repeated regions and thus further increase the  
405 completeness of assemblies. Moreover, a less stringent hybridization protocol should  
406 make it possible to capture sequences across even deeper evolutionary time. In sum,  
407 our approach has the potential of enhancing comparative genomic studies of  
408 continuous genic and intergenic regions between any eukaryotic species-group  
409 where genomic resources are scarce.

410

## Material and methods

### 411 Defining target region and probe design

412 The probe design was chiefly based on the high-quality genome of Atlantic cod,  
413 known as gadMor2 (Tørresen *et al.* 2017b). In addition, species-specific probes were  
414 designed based on low-coverage assembled genomes (Malmstrøm *et al.* 2016) for ten  
415 selected species representing six families in the Gadiformes order. These species  
416 were Atlantic cod (*Gadus morhua*), Alaskan Pollock (*Gadus chalcogrammus*), polar cod  
417 (*Boreogadus saida*), haddock (*Melanogrammus aeglefinus*), Silvery pout (*Gadiculus*  
418 *argenteus*), burbot (*Lota lota*), European hake (*Merluccius merluccius*), roughhead  
419 grenadier (*Macrourus berglax*), roughsnout grenadier (*Trachyrincus scabrus*) and  
420 marbled moray cod (*Muraenolepus marmoratus*).

421 To retrieve relevant sequence data for the probe design, the MN and LA *Hb*  
422 regions were extracted from gadMor2 (Figure 1). These sequences, hereby known as  
423 the target region, were then used queries in BLAST (Altschul *et al.* 1990) searches  
424 with an E-value threshold of <0.1 against the genome assembly data of all ten species.

425 In total, 5604 sequences from the chosen species were supplied to NimbleGen  
426 probe design. Protein coding genes from the ENSEMBL database were used to define  
427 the regions to be tiled in the probe design (Table S5) within the target region of the  
428 Atlantic cod, and the unitigs for each of the additional codfishes.

429 NimbleGen SeqCap EZ capture probes were designed by NimbleGen (Roche,  
430 Madison, USA) using a proprietary design algorithm. NimbleGen offers an in-  
431 solution sequence capture protocol, which includes custom made probes. Uniquely,  
432 the capture probes from NimbleGen are tiled to overlap the target area. 50 – 100 bp  
433 (average 75 bp) probes were designed tiled over the target region (subset of  
434 gadMor2) resulting in each base, on average, being covered by two probes.  
435 Additionally, raw reads from Illumina sequencing from (Malmstrøm *et al.* 2017) were  
436 used for each species to estimate repetitive sequences in each of the species'  
437 genomes, aiming to discard probes containing any repeats.

### 438 Sample collection and DNA extraction

439 Our goal working with animals is always to limit any harmful effects of our research  
440 on populations and individuals. Whenever possible we try to avoid animals being  
441 euthanized to serve our scientific purpose alone by collaborating with commercial  
442 fisheries or museums. The tissue samples used in this study are either from  
443 commercially fished individuals intended for human consumption or museum  
444 specimen. The commercially caught fish were immediately stunned, by bleeding

445 following standard procedures by a local fisherman. There is no specific legislation  
446 applicable to this manner of sampling in Norway, however it is in accordance with  
447 the guidelines set by the 'Norwegian consensus platform for replacement, reduction  
448 and refinement of animal experiments' ([www.norecopa.no](http://www.norecopa.no)).

449 DNA was extracted from tissue samples using High Salt DNA Extraction  
450 method by Phill Watts (<https://www.liverpool.ac.uk/~kempsj/IsolationofDNA.pdf>,  
451 [last day accessed: December 2017](#)). The concentration and purity of the DNA samples  
452 were quantified using NanoDrop (Thermo Scientific, Thermo Fisher Scientific,  
453 Waltham, MA, USA) and a Qubit fluorometer (Invitrogen, Thermo Fisher Scientific,  
454 Waltham, MA, USA). Due to poor DNA quality, three species included in the probe  
455 design; Alaskan Pollock, polar cod and roughsnout grenadier were excluded from  
456 further analysis. In total, eight species were sequenced; seven of these species were  
457 included in the probe design and one closely related species (cusk, *Brosme brosme*),  
458 which serves as a cross species capture experiment without species-specific probes.

### 459 **Capture, library preparation and sequencing**

460 The sequencing libraries were prepared following a modified Pacific Biosciences  
461 SeqCap EZ protocol. As multiplexing of the samples before capture was required,  
462 barcodes were designed at the Norwegian Sequencing Centre  
463 (<http://www.sequencing.uio.no>) using guidelines from Pacific Biosciences  
464 (Supplementary Materials and methods). Genomic DNA was sheared to 5 kb  
465 fragments using MegaRuptor (Diagenode, Seraing (Ougrée), Belgium). Due to poorer  
466 DNA quality, fragmenting was not done for European hake. For this sample together  
467 with fragmented DNA from roughhead grenadier, short fragments were removed  
468 using BluePippin (Sage Science, Beverly, MA, USA) before library preparation.  
469 Illumina libraries were prepared using KAPA Hyper Prep kit (Kapa Biosystems,  
470 Wilmington, MA, USA) and barcoded using different Illumina barcodes. PacBio  
471 barcodes were implemented during pre-capture amplification of libraries. After  
472 amplification, fragment length distribution was evaluated using Bioanalyzer (Agilent  
473 Technologies, Santa Clara, CA, USA) and samples were pooled in equimolar ratio.  
474 During hybridization, SeqCap EZ Developer Reagent (universal repeat blocker for  
475 use on vertebrate genomes) and oligos corresponding to Illumina and PacBio  
476 barcodes were used for blocking. Captured gDNA was amplified to ensure that  
477 sufficient amount of DNA was available for PacBio library preparation. Size selection  
478 of the libraries was performed using BluePippin. Final libraries were quality checked  
479 using Bioanalyzer and Qubit fluorometer (Invitrogen, Thermo Fisher Scientific,  
480 Waltham, MA, USA) and sequenced on RS II instrument (PacBio, Menlo Park, CA,



481 USA) using P6-C4 chemistry with 360 minutes movie time. In total, 9 SMRT cells  
482 were used for sequencing.

### 483 **De novo assemblies**

484 Reads were filtered and de-multiplexed using the 'RS\_reads of insert.1' pipeline on  
485 SMRT Portal (SMRT Analysis version smrtanalysis\_2.3.0.140936.p2.144836). Each set  
486 of reads corresponding to a given species was cross-checked with their respective  
487 six-nucleotide Illumina adapter. Reads containing an incorrect Illumina adapter were  
488 removed. Adapter sequences were then trimmed using the application Prinseq-lite  
489 v0.20.4 (Schmieder and Edwards 2011). The trimmed reads were assembled *de novo*  
490 using Canu v1.4 +155 changes (r8150 c0a988b6a106c27c6f993dfe586d2336282336a6)  
491 (Berlin *et al.* 2015). The Canu software is optimized for assembling single molecule  
492 high noise sequence data. We specified genome size as the size of the target region  
493 (300 kbp). Additionally, we ran PBJelly (English *et al.* 2012) on the Canu *de novo*  
494 assemblies, using the raw reads to possible bridge gaps between scaffolds, settings  
495 given in Supplementary Materials and Methods.

496 We assessed the assemblies by running Assemblathon 2 (Bradnam *et al.* 2013),  
497 which reports assembly metrics such as the longest contig, the number of contigs,  
498 and the N50 value. *De novo* assemblies of the MN and LA regions of Atlantic cod and  
499 haddock were aligned and compared to their reference genomes, gadMor2 and  
500 melAeg respectively, using BLAST and BWA v0.7.10 (Li and Durbin 2009) to  
501 determine syntenic similarities and assembly completeness.

### 502 **Estimating capture success**

503 PacBio reads for all the species were mapped back to the Atlantic cod genome  
504 assembly (gadMor2) in order to determine sequence capture success and target  
505 mapping depths. Mapping was done using BWA-MEM v0.7.10 (Li and Durbin 2009).  
506 Target-area read depth for all the species based on mapping against gadMor2, were  
507 calculated using Samtools v1.3.1 (Li *et al.* 2009). We calculated both average and  
508 median mapping depth against the target region as a whole and for the MN and LA  
509 region separately. We also calculated percentage of reads that mapped to the target  
510 region, and the percentage of the target regions covered by reads to a minimum  
511 depth of 10x. To compare assemblies to the target region we additionally mapped the  
512 assemblies to the target region. In order to verify the sequence capture process,  
513 sequence data for Atlantic cod and haddock were mapped back to their reference  
514 genomes using BWA-mem v0.7.10 (Li and Durbin 2009). The results were visualized  
515 using Integrative Genome Viewer (Robinson *et al.* 2011).

516 To obtain an independent measure of divergence between species in the  
517 capture experiment we calculated genome wide level of divergence of each species to  
518 the reference genome of Atlantic cod using low-coverage whole-genome sequence  
519 data from (Malmstrøm *et al.* 2017). We mapped raw reads to Atlantic cod using  
520 BWA-MEM (Li and Durbin 2009) and called SNPs using the Freebayes variant caller  
521 (Garrison and Marth 2017). Some species are more closely related to Atlantic cod  
522 than others, which could introduce a bias in mapping. To avoid this, we only looked  
523 at genomic regions where all species mapped. The number of SNPs was then used as  
524 an estimate of genome-wide divergence of each species to Atlantic cod. We also  
525 mapped a low-coverage genome of Atlantic cod to the Atlantic cod reference genome  
526 as a control.

527 In pursuance of factors explaining capture success we tested for correlations  
528 and plotted the relationship between the genome wide level of divergence and the  
529 following variables; median mapping depth against the target region (for total, LA  
530 and MN, respectively); percentage of reads that mapped to the target region; and the  
531 percentage of the target region covered by reads. All tests and plots were done using  
532 R version 3.2.5 (Team 2013).

533 Assembly continuity is very often hampered by the presence of repeats, which  
534 create gaps. We therefore quantified repeat-content in the target region extracted  
535 from gadMor2 and orthologous regions in haddock using Repeatmasker Open 3.0  
536 (Smit *et al.* 2010) for the MN region and the LA region separately.

### 537 **Identifying gene location and synteny**

538 In order to identify the genes of interest and their location in the assembly we used  
539 local sequence alignment algorithm BLAST v2.4.0 (Altschul *et al.* 1990) with protein  
540 sequences of the genes of interest (Table S5) as queries. tblastn was used with an e-  
541 value of 0.1. Investigation of *Hbb1-Hba1* promoter region was done for four species,  
542 Atlantic cod, haddock, silvery cod and cusk. Sequences were aligned with ClustalW  
543 default settings using MEGA7 (Kumar *et al.* 2016). Ancestral sequence reconstruction  
544 was carried out for *Hbb-1* gene sequences from 24 species of codfishes from (Baalsrud  
545 *et al.* 2017) using a maximum likelihood method implemented in MEGA7 (Kumar *et*  
546 *al.* 2016).

547 Additionally, we estimated sequence identity using EMBOSS Needle (Rice *et*  
548 *al.* 2000) with default settings, between *Hbb* gene sequences from (Baalsrud *et al.*  
549 2017) that were missing and present in the *de novo* assemblies to evaluate similarity  
550 (Table S2).

551 **Acknowledgements**

552 We would like to thank Marianne H. Selander Hansen and Alexander J. Nederbragt  
553 for help with the initial design of this project. All computational work was  
554 performed on the Abel Supercomputing Cluster (Norwegian Metacenter for High-  
555 Performance Computing (NOTUR) and the University of Oslo), operated by the  
556 Research Computing Services group at USIT, the University of Oslo IT Department.  
557 Sequencing library creation and high-throughput sequencing were carried out at the  
558 Norwegian Sequencing Centre (NSC), University of Oslo, Norway. This work was  
559 funded by a grant awarded to K.S.J. from the Research Council of Norway (RCN  
560 grant 222378).

561

562 **Author contributions**

563 H.T.B. and S.J. initially conceived and designed the study, with input from S.N.K.H,  
564 A.T.-K., M.S., G.O., R.S., and K.S.J. Tissue samples were provided by S.J. and H.T.B.  
565 Probe design was carried out by T.R. with assistance from S.N.K.H and H.T.B. DNA  
566 extraction and sequence library preparation was performed by S.N.K.H and A.T.-K,  
567 respectively. Sequence capture was carried out by S.N.K.H, A.T.-K., M.S. and G.O.  
568 Filtering, mapping of sequences and *de novo* assemblies was done by S.N.K.H.,  
569 assisted by O.K.T and H.T.B. Annotation of genes, synteny analyses, statistical  
570 analyses and construction of all figures and tables was done by S.N.K.H and H.T.B.  
571 The manuscript was written by S.N.K.H and H.T.B. with input from S.J. and K.S.J.

572 **Competing interests**

573 The authors declare that they have no competing interests.

574 **Data and materials availability**

575 All reads and assemblies (unitigs) reported on here, and the target region, subset of  
576 gadMor2 have been deposited at figshare under doi/xxx.

577 **References**

- 578  
579 Altschul, S. F., W. Gish, W. Miller, E. W. Myers, and D. J. Lipman, 1990 Basic local  
580 alignment search tool. *J. Mol. Biol.* 215: 403–410.
- 581 Andersen, Ø., O. F. Wetten, M. C. De Rosa, C. Andre, C. Carelli Alinovi *et al.*, 2009  
582 Haemoglobin polymorphisms affect the oxygen-binding properties in Atlantic  
583 cod populations. *Proc. Biol. Sci.* 276: 833–841.
- 584 Baalsrud, H. T., K. L. Voje, O. K. Tørresen, M. H. Solbakken, M. Matschiner *et al.*,  
585 2017 Evolution of Hemoglobin Genes in Codfishes Influenced by Ocean Depth.  
586 *Sci Rep* 7: 168–10.
- 587 Barlow, S. L., J. Metcalfe, D. A. Righton, and M. Berenbrink, 2017 Life on the edge: O  
588 2binding in Atlantic cod red blood cells near their southern distribution limit is  
589 not sensitive to temperature or haemoglobin genotype. *Journal of Experimental*  
590 *Biology* 220: 414–424.
- 591 Berlin, K., S. Koren, C.-S. Chin, J. P. Drake, J. M. Landolin *et al.*, 2015 Assembling  
592 large genomes with single-molecule sequencing and locality-sensitive hashing.  
593 *Nature Biotechnology* 33: 623–630.
- 594 Bickhart, D. M., B. D. Rosen, S. Koren, B. L. Sayre, A. R. Hastie *et al.*, 2017 Single-  
595 molecule sequencing and chromatin conformation capture enable de novo  
596 reference assembly of the domestic goat genome. *Nat Genet* 431: 931–11.
- 597 Borza, T., C. Stone, A. K. Gamperl, and S. Bowman, 2009 Atlantic cod (*Gadus morhua*)  
598 hemoglobin genes: multiplicity and polymorphism. *BMC Genetics* 10: 51.
- 599 Bradnam, K. R., J. N. Fass, A. Alexandrov, P. Baranay, M. Bechner *et al.*, 2013  
600 Assemblathon 2: evaluating de novo methods of genome assembly in three  
601 vertebrate species. *Giga Sci* 2: 10.
- 602 Bragg, J. G., S. Potter, K. Bi, and C. Moritz, 2016 Exon capture phylogenomics:  
603 efficacy across scales of divergence. *Molecular Ecology Resources* 16: 1059–1068.
- 604 Broeckx, B. J. G., F. Coopman, G. E. C. Verhoeven, V. Bavegems, S. De Keulenaer *et*  
605 *al.*, 2014 Development and performance of a targeted whole exome sequencing  
606 enrichment kit for the dog (*Canis Familiaris* Build 3.1). *Sci Rep* 4: 1522–4.
- 607 Ellegren, H., 2014 Genome sequencing and population genomics in non-model  
608 organisms. *Trends in Ecology & Evolution* 29: 51–63.
- 609 English, A. C., S. Richards, Y. Han, M. Wang, V. Vee *et al.*, 2012 Mind the Gap:  
610 Upgrading Genomes with Pacific Biosciences RS Long-Read Sequencing

- 611 Technology (Z. Liu, Ed.). PLoS ONE 7: e47768.
- 612 Eschemeyer, W. N., and R. Fricke, 2017 Catalog of fishes.  
613 <http://research.calacademy.org/researchichthyology/catalog/fishcatmain.asp>.
- 614 Feng, J., S. Liu, X. Wang, R. Wang, J. Zhang *et al.*, 2014 Channel catfish hemoglobin  
615 genes: Identification, phylogenetic and syntenic analysis, and specific induction  
616 in response to heat stress. *Comparative Biochemistry and Physiology Part D:*  
617 *Genomics and Proteomics* 9: 11–22.
- 618 Garrison, E., and G. Marth, 2017 Haplotype-based variant detection from short-read  
619 sequencing. 1–9.
- 620 George, R. D., G. McVicker, R. Diederich, S. B. Ng, A. P. MacKenzie *et al.*, 2011 Trans  
621 genomic capture and sequencing of primate exomes reveals new targets of  
622 positive selection. *Genome Research* 21: 1686–1694.
- 623 Goodwin, S., J. D. McPherson, and W. R. McCombie, 2016 Coming of age: ten years  
624 of next-generation sequencing technologies. *Nat Rev Genet* 17: 333–351.
- 625 Grover, C. E., A. Salmon, and J. F. Wendel, 2012 Targeted sequence capture as a  
626 powerful tool for evolutionary analysis. *American Journal of Botany* 99: 312–319.
- 627 Guo, Y., J. Long, J. He, C.-I. Li, Q. Cai *et al.*, 2012 Exome sequencing generates high  
628 quality data in non-target regions. *BMC Genomics* 13:.
- 629 Hedtke, S. M., M. J. Morgan, D. C. Cannatella, and D. M. Hillis, 2013 Targeted  
630 Enrichment: Maximizing Orthologous Gene Comparisons across Deep  
631 Evolutionary Time (U. Joger, Ed.). PLoS ONE 8: e67908.
- 632 Huddleston, J., S. Ranade, M. Malig, F. Antonacci, M. Chaisson *et al.*, 2014  
633 Reconstructing complex regions of genomes using long-read sequencing  
634 technology. *Genome Research* 24: 688–696.
- 635 Jones, M. R., and J. M. Good, 2015 Targeted capture in evolutionary and ecological  
636 genomics. *Molecular Ecology* 25: 185–202.
- 637 Karpov, A. K., and G. G. Novikov, 1980 Hemoglobin alloforms in cod, *Gadhus morhua*  
638 (*Gadiformes*, *Gadidae*), their functional characteristics and occurrence in  
639 populations. *Journal of Ichthyology* 20: 45–50.
- 640 Kim, K. E., P. Peluso, P. Babayan, P. J. Yeadon, C. Yu *et al.*, 2014 Long-read, whole-  
641 genome shotgun sequence data for five model organisms. *Sci. Data* 1: 140045–10.
- 642 Koonin, E. V., and Y. I. Wolf, 2010 Constraints and plasticity in genome and  
643 molecular-phenome evolution. *Nat Rev Genet* 11: 487–498.

- 644 Korlach, J., G. Gedman, S. B. Kingan, C.-S. Chin, J. T. Howard *et al.*, 2017 *Giga Sci* 6:  
645 1–16.
- 646 Kumar, S., G. Stecher, and K. Tamura, 2016 MEGA7: Molecular Evolutionary  
647 Genetics Analysis Version 7.0 for Bigger Datasets. *Molecular Biology and*  
648 *Evolution* 33: 1870–1874.
- 649 Li, C., S. Corrigan, L. Yang, N. Straube, M. Harris *et al.*, 2015 DNA capture reveals  
650 transoceanic gene flow in endangered river sharks. *Proc. Natl. Acad. Sci. U.S.A.*  
651 112: 13302–13307.
- 652 Li, H., and R. Durbin, 2009 Fast and accurate short read alignment with Burrows-  
653 Wheeler transform. *Bioinformatics* 25: 1754–1760.
- 654 Li, H., B. Handsaker, A. Wysoker, T. Fennell, J. Ruan *et al.*, 2009 The Sequence  
655 Alignment/Map format and SAMtools. *Bioinformatics* 25: 2078–2079.
- 656 Malmstrøm, M., M. Matschiner, O. K. Tørresen, K. S. Jakobsen, and S. Jentoft, 2017  
657 Whole genome sequencing data and de novo draft assemblies for 66 teleost  
658 species. *Sci. Data* 4: 1–13.
- 659 Malmstrøm, M., M. Matschiner, O. K. Tørresen, B. Star, L. G. Snipen *et al.*, 2016  
660 Evolution of the immune system influences speciation rates in teleost fishes. *Nat*  
661 *Genet* 48: 1204–1210.
- 662 Mascher, M., G. J. Muehlbauer, D. S. Rokhsar, J. Chapman, J. Schmutz *et al.*, 2013  
663 Anchoring and ordering NGS contig assemblies by population sequencing  
664 (POPSEQ). *Plant J* 76: 718–727.
- 665 Miller, J. R., S. Koren, and G. Sutton, 2010 Assembly algorithms for next-generation  
666 sequencing data. *Genomics* 95: 315–327.
- 667 Morin, A., T. Kwan, B. Ge, L. Letourneau, M. Ban *et al.*, 2016 Immunoseq: the  
668 identification of functionally relevant variants through targeted capture and  
669 sequencing of active regulatory regions in human immune cells. *BMC Med*  
670 *Genomics* 9: 7–12.
- 671 Newman, C. E., and C. C. Austin, 2016 Sequence capture and next-generation  
672 sequencing of ultraconserved elements in a large-genome salamander. *Molecular*  
673 *Ecology* 25: 6162–6174.
- 674 Ng, S. B., E. H. Turner, P. D. Robertson, S. D. Flygare, A. W. Bigham *et al.*, 2009  
675 Targeted capture and massively parallel sequencing of 12 human exomes. *Nature*  
676 461: 272–276.
- 677 Opazo, J. C., G. T. Butts, M. F. Nery, J. F. Storz, and F. G. Hoffmann, 2013 Whole-

- 678 genome duplication and the functional diversification of teleost fish  
679 hemoglobins. *Molecular Biology and Evolution* 30: 140–153.
- 680 Patrushev, L. I., and T. F. Kovalenko, 2014 Functions of noncoding sequences in  
681 mammalian genomes. *Biochemistry (Mosc)* 79: 1442–1469.
- 682 Quinn, N. L., K. A. Boroevich, K. P. Lubieniecki, W. Chow, E. A. Davidson *et al.*, 2010  
683 Genomic organization and evolution of the Atlantic salmon hemoglobin  
684 repertoire. *BMC Genomics* 11: 539.
- 685 Rice, P., I. Longden, and A. Bleasby, 2000 EMBOSS: the European Molecular Biology  
686 Open Software Suite. *Trends in Genetics* 16: 276–277.
- 687 Robinson, J. T., H. Thorvaldsdottir, W. Winckler, M. Guttman, E. S. Lander *et al.*, 2011  
688 Integrative genomics viewer. *Nature Biotechnology* 29: 24–26.
- 689 Samorodnitsky, E., J. Datta, B. M. Jewell, R. Hagopian, J. Miya *et al.*, 2015 Comparison  
690 of custom capture for targeted next-generation DNA sequencing. *J Mol Diagn* 17:  
691 64–75.
- 692 Samuels, D. C., L. Han, J. Li, S. Quanghu, T. A. Clark *et al.*, 2013 Finding the lost  
693 treasures in exome sequencing data. *Trends in Genetics* 29: 593–599.
- 694 Schmieder, R., and R. Edwards, 2011 Quality control and preprocessing of  
695 metagenomic datasets. *Bioinformatics* 27: 863–864.
- 696 Schott, R. K., B. Panesar, D. C. Card, M. Preston, T. A. Castoe *et al.*, 2017 Targeted  
697 Capture of Complete Coding Regions across Divergent Species. *Genome Biology*  
698 and Evolution 9: 398–414.
- 699 Smit, A., R. Hubley, and P. Green, 2010 RepeatMasker Open 3.0.  
700 <http://www.repeatmasker.org>.
- 701 Star, B., A. J. Nederbragt, S. Jentoft, U. Grimholt, M. Malmstrøm *et al.*, 2011 The  
702 genome sequence of Atlantic cod reveals a unique immune system. *Nature* 477:  
703 207–210.
- 704 Syring, J. V., J. A. Tennessen, T. N. Jennings, J. Wegrzyn, C. Scelfo-Dalbey *et al.*, 2016  
705 Targeted Capture Sequencing in Whitebark Pine Reveals Range-Wide  
706 Demographic and Adaptive Patterns Despite Challenges of a Large, Repetitive  
707 Genome. *Front Plant Sci* 7: 484.
- 708 Team, R. C., 2013 R Core Team. R: A language and environment for statistical  
709 computing. R Foundation for Statistical Computing, Vienna, Austria: ISBN 3-  
710 900051-07-0, URL <http://www.R-project.org/>.(3.3. 1) Software Vienna, Austria: R  
711 Foundation for Statistical Computing.

- 712 Teer, J. K., L. L. Bonnycastle, P. S. Chines, N. F. Hansen, N. Aoyama *et al.*, 2010  
713 Systematic comparison of three genomic enrichment methods for massively  
714 parallel DNA sequencing. *Genome Research* 20: 1420–1431.
- 715 Turner, E. H., S. B. Ng, D. A. Nickerson, and J. Shendure, 2009 Methods for Genomic  
716 Partitioning. *Annu. Rev. Genom. Human Genet.* 10: 263–284.
- 717 Tørresen, O. K., M. S. O. Briec, M. H. Solbakken, E. Sørhus, A. J. Nederbragt *et al.*,  
718 2017a Genomic architecture of codfishes featured by expansions of innate  
719 immune genes and short tandem repeats. *bioRxiv* 1–42.
- 720 Tørresen, O. K., B. Star, S. Jentoft, W. B. Reinart, H. Grove *et al.*, 2017b An improved  
721 genome assembly uncovers prolific tandem repeats in Atlantic cod. *BMC*  
722 *Genomics* 18: 311–23.
- 723 Volff, J.-N., 2005 Genome evolution and biodiversity in teleost fish. *Heredity* 94: 280–  
724 294.
- 725 Wells, R. M. G., 2005 Blood-Gas Transport and Hemoglobin Function in Polar Fishes:  
726 Does Low Temperature Explain Physiological Characters?, pp. 281–316 in *Fish*  
727 *Physiology*, Fish Physiology, Elsevier.
- 728 Wetten, O. F., A. J. Nederbragt, R. C. Wilson, K. S. Jakobsen, R. B. Edvardsen *et al.*,  
729 2010 Genomic organization and gene expression of the multiple globins in  
730 Atlantic cod: conservation of globin-flanking genes in chordates infers the origin  
731 of the vertebrate globin clusters. *BMC Evolutionary Biology* 10: 315.
- 732 Woolfe, A., M. Goodson, D. K. Goode, P. Snell, G. K. McEwen *et al.*, 2004 Highly  
733 Conserved Non-Coding Sequences Are Associated with Vertebrate Development  
734 (Sean Eddy, Ed.). *PLoS Biol* 3: e7.
- 735 Yoshihara, M., D. Saito, T. Sato, O. Ohara, T. Kuramoto *et al.*, 2016 Design and  
736 application of a target capture sequencing of exons and conserved non-coding  
737 sequences for the rat. *BMC Genomics* 17: 1522–11.



738

## Figure legends

739 **Figure 1: Flowchart of sequence capture approach.** a) Sequence data from the  
740 Atlantic cod genome (gadMor2 (Tørresen *et al.* 2017b)) combined with gene  
741 sequences of target genes and sequences from low coverage genomes of the  
742 additional codfishes are combined to generate probes. b) Isolated DNA is  
743 multiplexed with Illumina and PacBio barcodes. c) Raw reads for each species are  
744 used to score all probes, ensuring that no repeated sequences are present. DNA  
745 Probes are used in solution on isolated DNA for all of the included species,  
746 hybridizing to the target sequences. Target sequences are then captures and  
747 sequences on the PacBio RSII sequencing platform. d) Downstream bioinformatics  
748 includes de-multiplexing of reads and trimming, making the reads ready for  
749 downstream analysis such as mapping and *de novo* assembly.

750

751 **Figure 2: Mapping of reads and assemblies against the MN target region.** Each  
752 panel shows the reads and *de novo* assembly mapped against the MN target region in  
753 grey and orange, respectively, for species a.) Atlantic cod, b) haddock, c) silvery  
754 pout, d) cusk, e) burbot, f) European hake, g) marbled moray cod and h) roughhead  
755 grenadier. The positions of genes in the target region are indicated at the top.

756

757 **Figure 3: Mapping of reads and assemblies against the LA target region.** Each  
758 panel shows the reads and *de novo* assembly mapped against the LA target region in  
759 grey and orange, respectively, for species a) Atlantic cod, b) haddock, c) silvery pout,  
760 d) cusk, e) burbot, f) European hake, g) marbled moray cod and h) roughhead  
761 grenadier. The positions of genes in the target region are indicated at the top.

762

763 **Figure 4: The relationship between capture success and genomic divergence to**  
764 **Atlantic cod.** Linear regression of the relationship between the genomic divergence  
765 to Atlantic cod (SNPs  $\times 10^5$ ) and a) median mapping depth for the MN region (blue),  
766 LA region (red) and the combined target region (black); b) the percentage of reads  
767 mapping to the target region; c) the percentage of the target region covered by reads  
768 to a minimum depth of 10x. For each regression the correlation coefficient,  $r$ , is  
769 shown along with a p-value. Each data point is labeled by species according to this  
770 code: Ac=Atlantic cod, H=haddock, Sp=silvery pout, C=cusk, B=burbot, Eh=European  
771 hake, Mm=marbled moray cod and Rg=roughhead grenadier.

772

773 **Figure 5: Synteny of the Hb gene clusters.** Genomic synteny of the hemoglobin gene  
774 clusters shown at the top for the genomes of Atlantic cod (gadMor2 (Tørresen *et al.*  
775 2017b)) and haddock (MelAeg (Tørresen *et al.* 2017a)). Below, the genomic synteny  
776 inferred from the *de novo* assemblies for all of the species included in the capture  
777 experiment. Stippled lines indicate assembly gaps – here we assume that the  
778 orientation of genes corresponds to the genomes of Atlantic cod and haddock. Gray  
779 boxes indicate genes that have been identified in (Baalsrud *et al.* 2017), but are absent

780 in the *de novo* assemblies. a) Synteny across the MN region b) Synteny across the LA  
781 region.

782

783 **Figure 6: Polymorphisms in the bi-directional promoter between *Hba1* and *Hbb1***  
784 **for five species in the Gadidae family.**

785 A schematic representation of *Hba1* and *Hbb1* with the promoter region between  
786 them. The region contains an indel polymorphism of variable length across the five  
787 species, as indicated by gaps. For each species/variant the alignment is shown along  
788 with amino acid substitutions at positions 55 and 62 in the translated part of the *Hbb1*  
789 gene.

## 790 Supporting Information Legends

791 **Table S1:** For each species, the average and median depth of reads mapped against  
792 the target region (for MN, LA and total), the genomic divergence to Atlantic cod  
793 (number of SNPs), percentage of nucleotides mapped to the target and the  
794 percentage of the target region with more than 10x coverage.

795  
796 **Table S2:** Estimated sequence identity using EMBOSS Needle (Rice *et al.* 2000) with  
797 default settings, between paralogous Hbb gene sequences from (Baalsrud *et al.* 2017).  
798 Genes highlighted in bold are missing from the assemblies in figure 5.

799  
800 **Table S3:** Amino acids at positions 55 and 62 in Hbb1 in various codfishes taken  
801 from (Baalsrud *et al.* 2017).

802  
803 **Table S4:** Amount of repeated sequences in the target region of the Atlantic cod  
804 (*gadMor2* (Tørresen *et al.* 2017b)) and haddock (*melAeg* (Tørresen *et al.* 2017a)) given  
805 in percentage.

806  
807 **Table S5:** Genes provided Nimblegen for the probe design, and used to identify  
808 genes in *de novo* assemblies. For each gene, the gene name is given with its ENSEMBL  
809 name and ENSEMBL identifier.

810  
811 **Figure S1:** Ancestral reconstruction of amino acids at position 55 in the *Hbb-1* gene in  
812 Gadiformes. Phylogenetic trees and ancestral reconstruction was carried out in  
813 MEGA 7.0.

814  
815 **Figure S2:** Ancestral reconstruction of amino acids at position 62 in the *Hbb-1* gene in  
816 Gadiformes. Phylogenetic trees and ancestral reconstruction was carried out in  
817 MEGA 7.0.

818 **Figures**

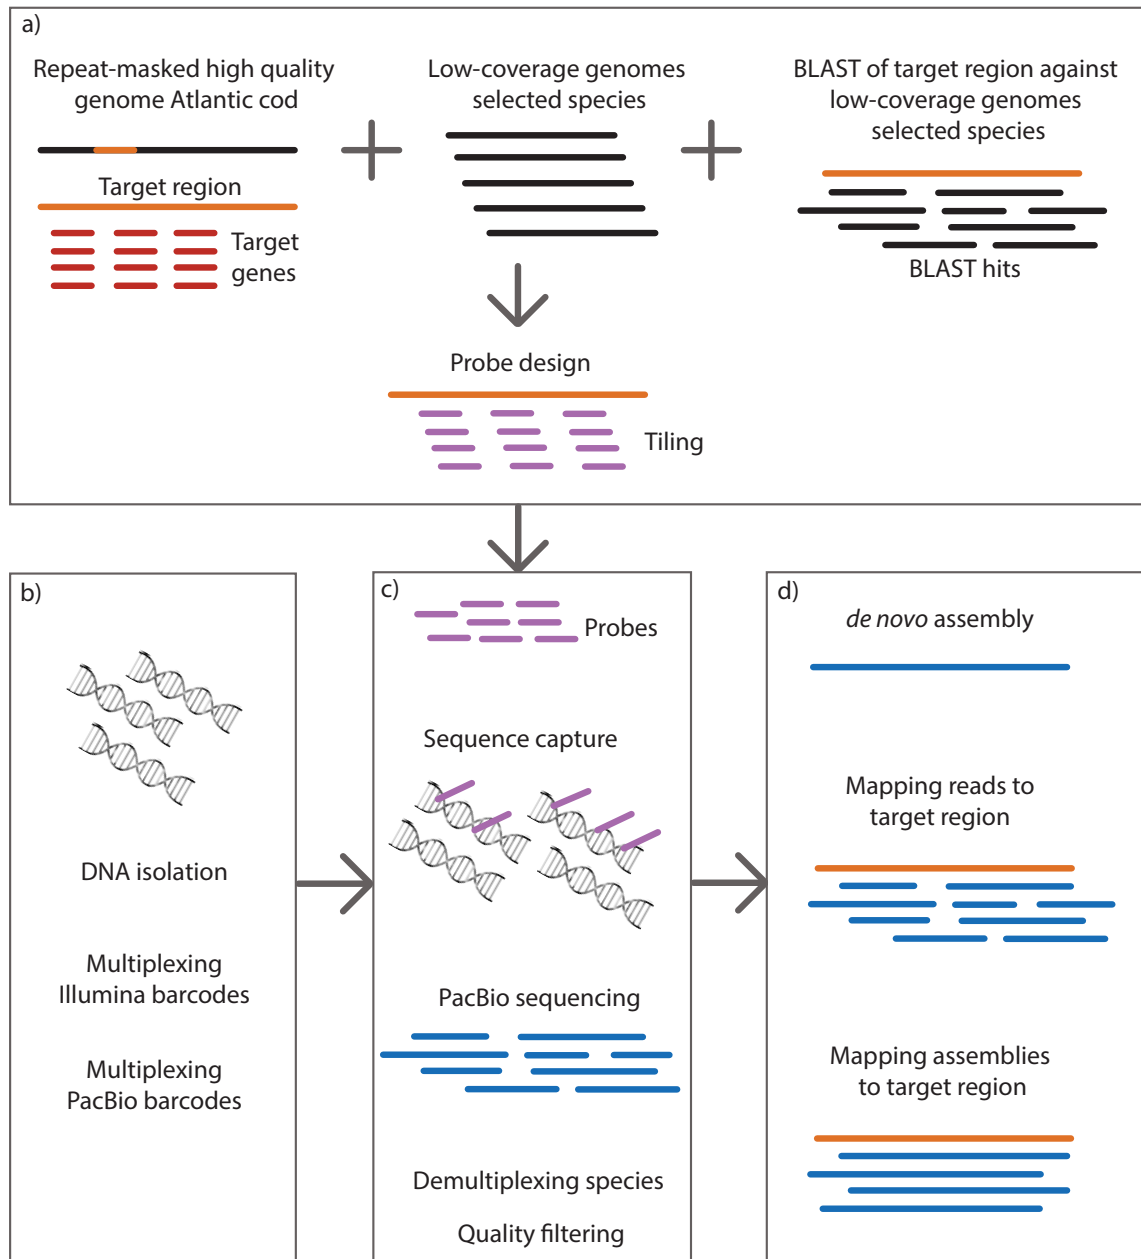

819  
820 Figure 1  
821

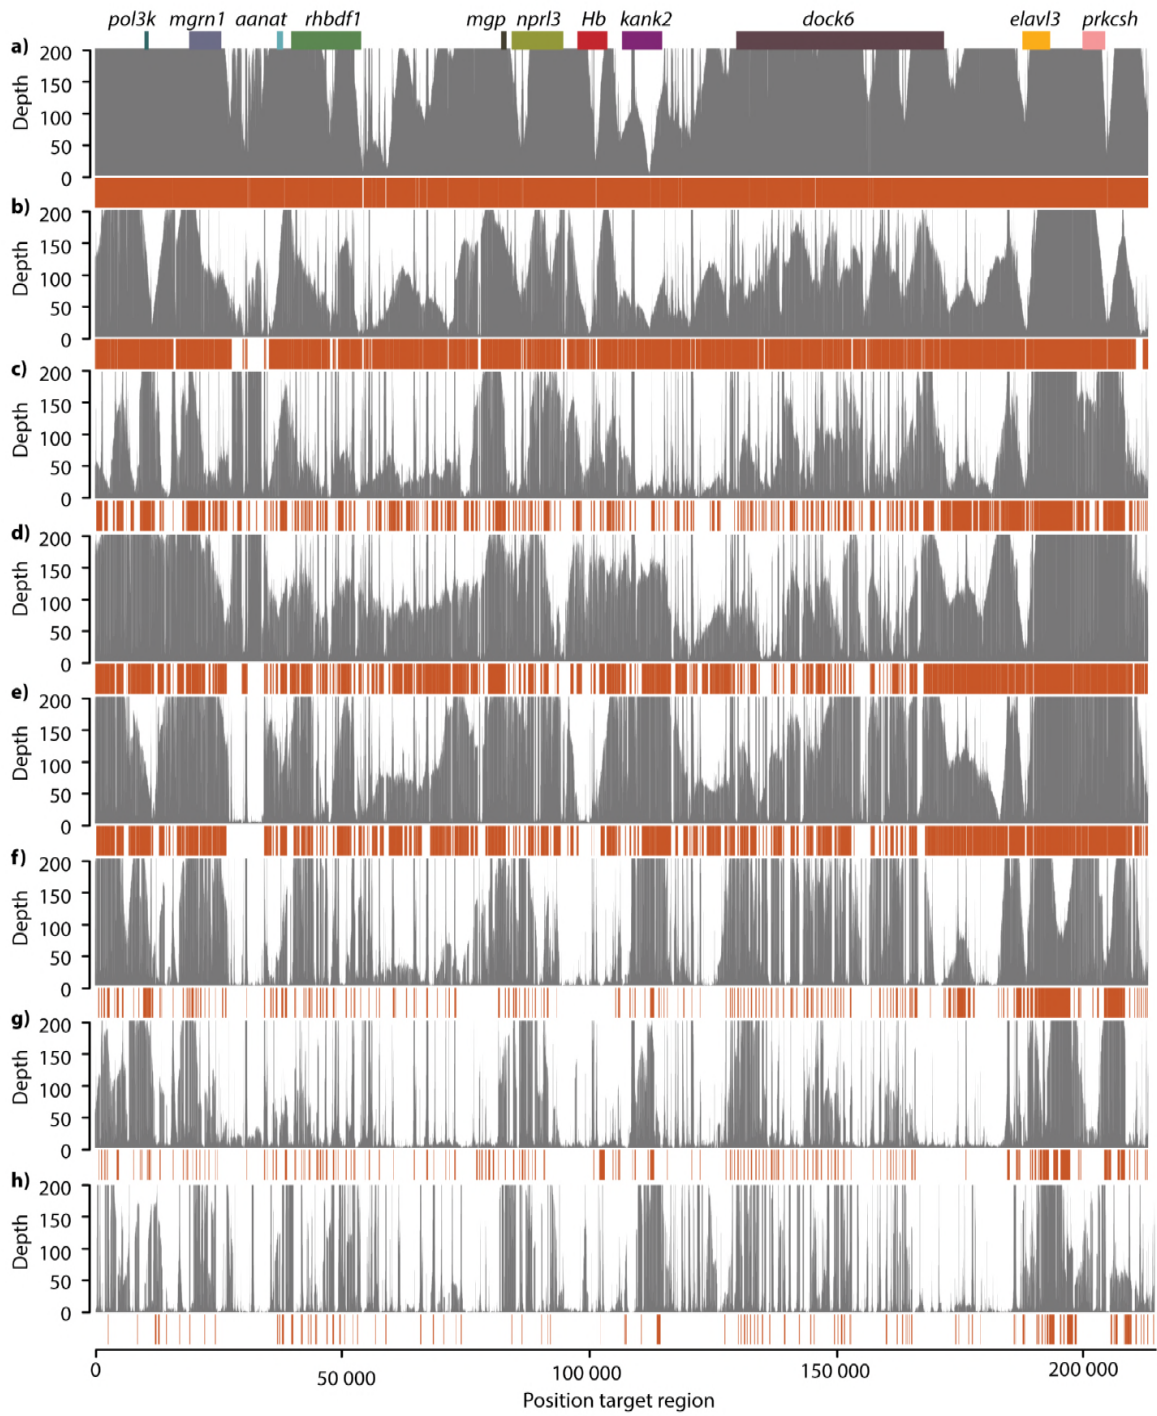

822  
823  
824

Figure 2

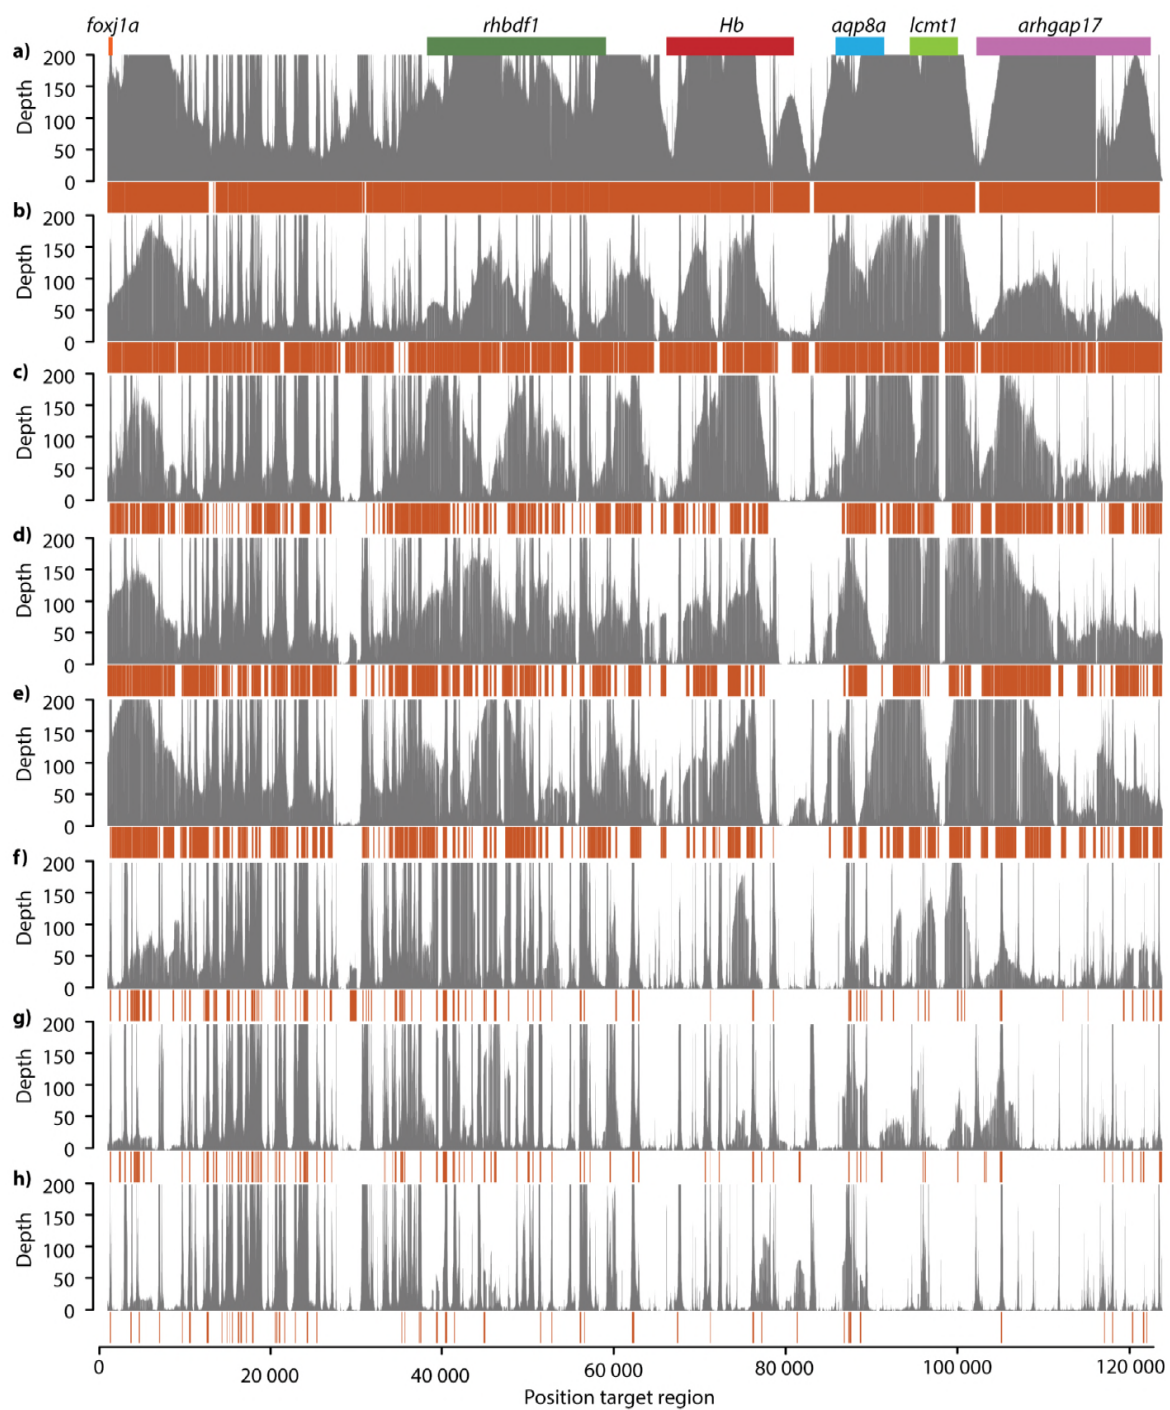

825  
826  
827

Figure 3

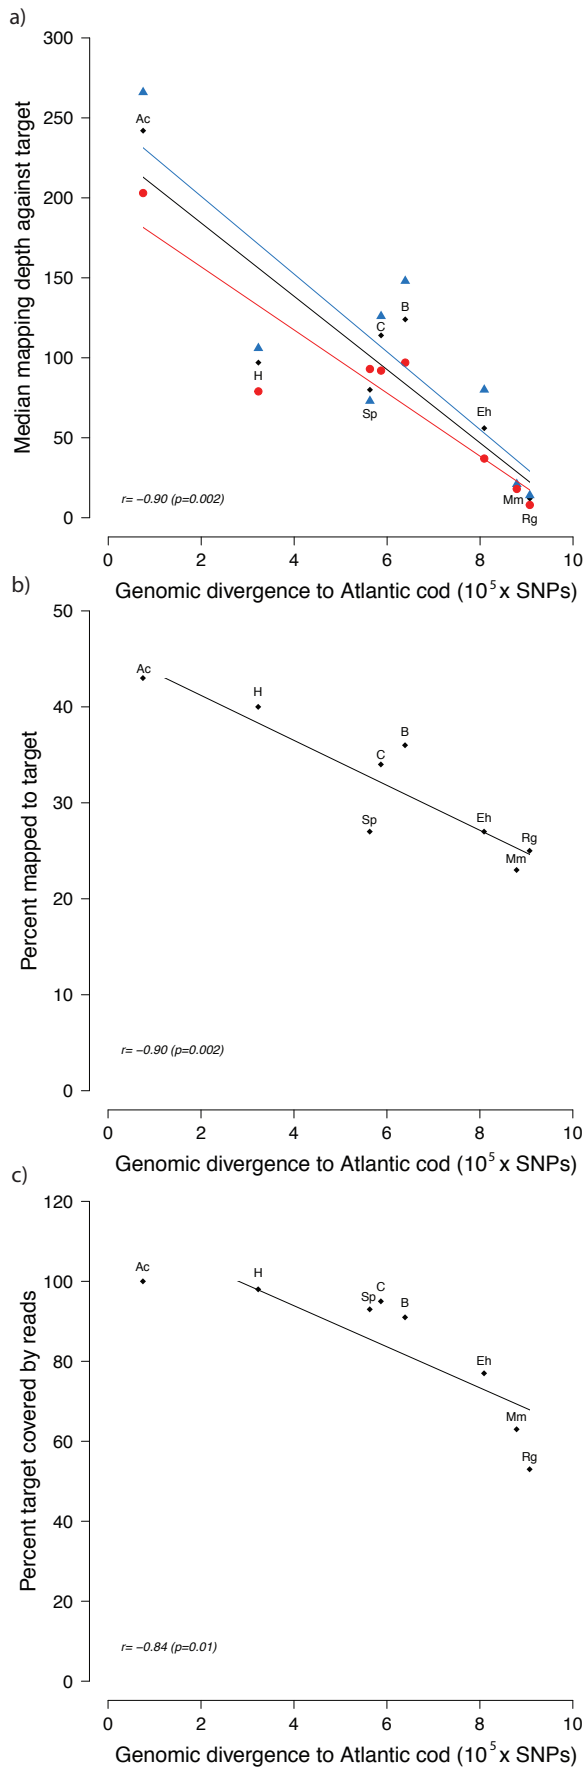

828  
829 Figure 4

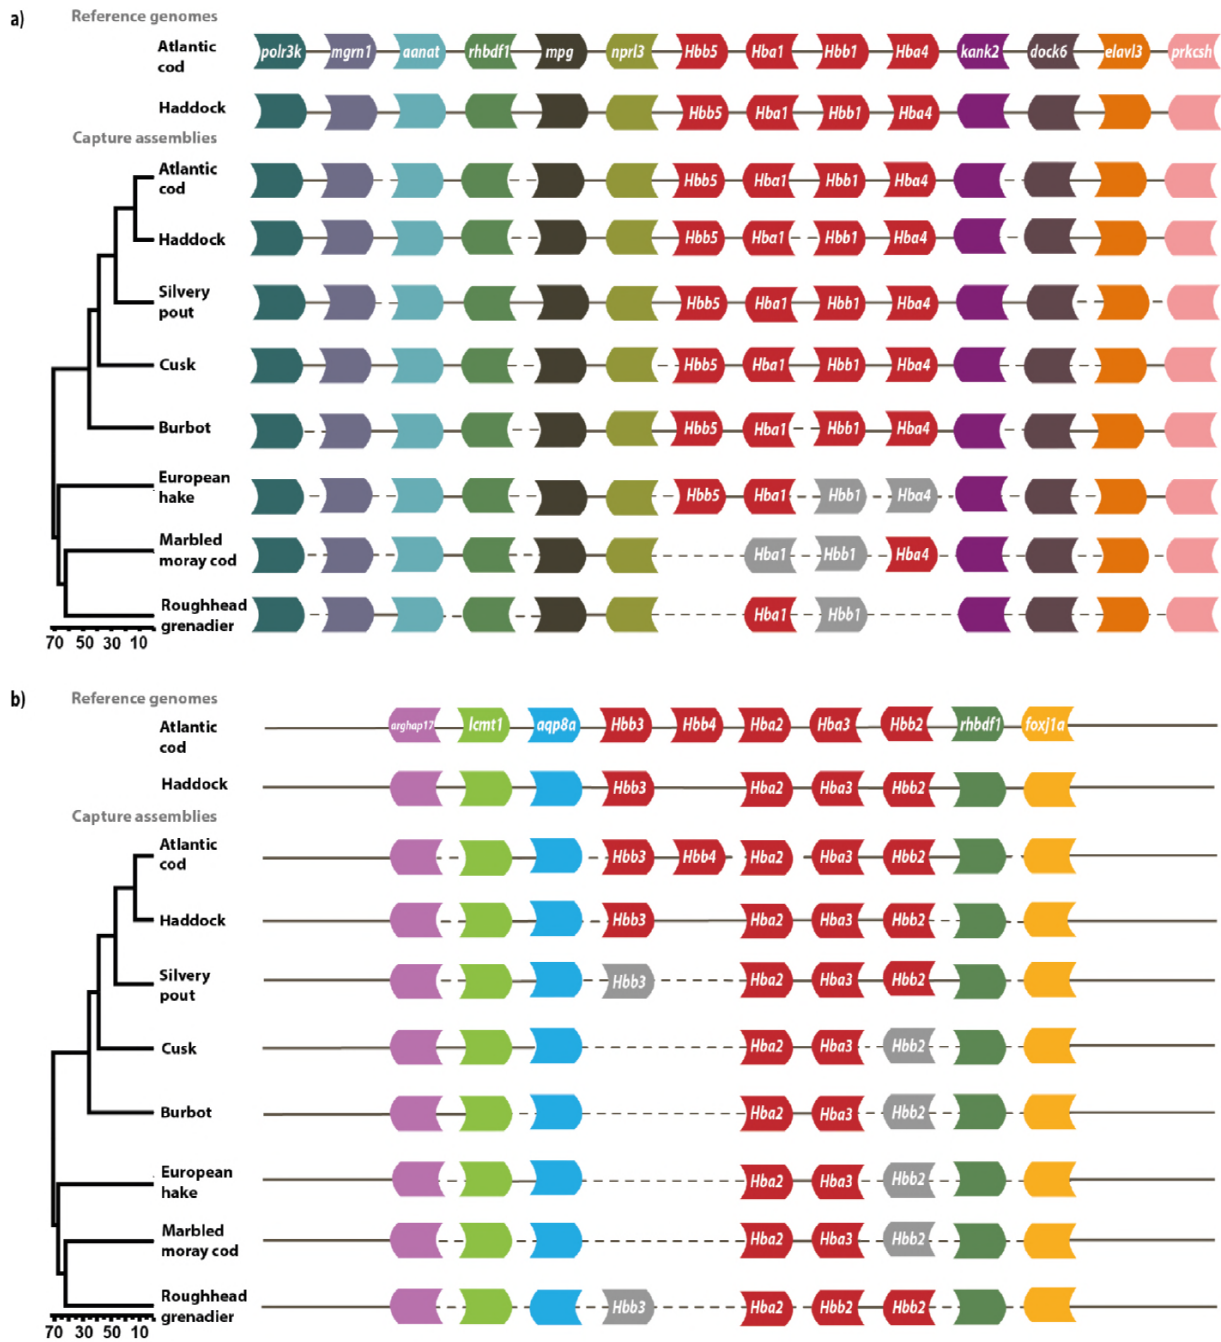

830  
831  
832

Figure 5



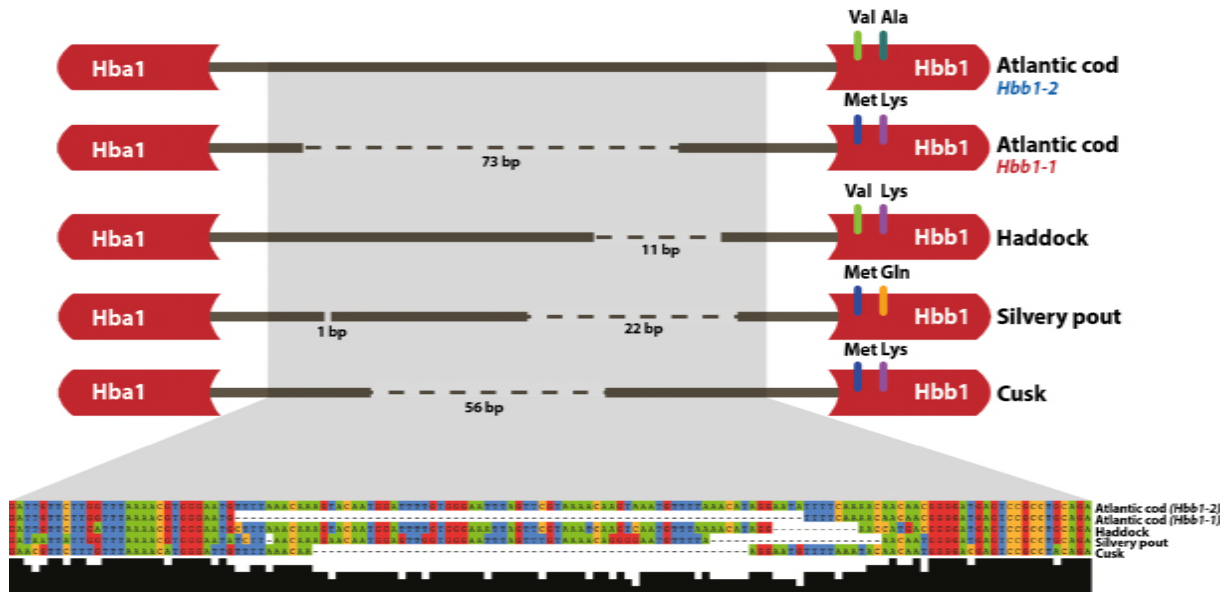

Figure 6

836 **Tables**

837 **Table 1.** Number of reads and bases captured and sequenced for each species, and  
838 number of utgs, largest utg and N50 in the assemblies.

| Species                    | Latin name                      | Number of reads | Number of bases | Number of utgs | Largest utg (bp) | N50 (bp) |
|----------------------------|---------------------------------|-----------------|-----------------|----------------|------------------|----------|
| <b>Atlantic cod</b>        | <i>Gadus morhua</i>             | 73005           | 217252583       | 278            | 79 020           | 7 728    |
| <b>Haddock</b>             | <i>Melanogrammus aeglefinus</i> | 35573           | 107839552       | 227            | 52 433           | 7 227    |
| <b>Silvery pout</b>        | <i>Gadiculus argenteus</i>      | 69775           | 212519845       | 410            | 35 801           | 7 098    |
| <b>Cusk</b>                | <i>Brosme brosme</i>            | 55348           | 175883008       | 394            | 64 145           | 7 322    |
| <b>Burbot</b>              | <i>Lota lota</i>                | 56155           | 165360828       | 205            | 70 602           | 8 055    |
| <b>European hake</b>       | <i>Merluccius merluccius</i>    | 65661           | 180558336       | 311            | 31 558           | 6 523    |
| <b>Marbled moray cod</b>   | <i>Muraenolepus marmoratus</i>  | 52076           | 148100933       | 455            | 30 019           | 6 632    |
| <b>Roughhead grenadier</b> | <i>Macrourus berglax</i>        | 46195           | 129085001       | 325            | 35 216           | 7122     |

839

840
